# Supplementary material
Source: PubMed Central journal article supplement (PMC5136487)
Supplement: cdd201676x1.pdf [file cdd201676x1.pdf]

## SUPPLEMENTARY INFORMATION FOR CDD-16-0342

### SUPPLEMENTARY FIGURE LEGENDS

#### Figure S1. Spatial expression patterns of genes in the critical region for brain abnormalities.

- a. Gene expression of *CAPN8*, *CAPN2* and *TP53BP2* across human tissues. Data exported from the Genotype Tissue Expression project (GTEx). Brain regions are coloured yellow and highlighted by the red line. RPKM, reads per kilobase of transcript length per million mapped reads.
- b. Regions of the prenatal human brain with the highest *TP53BP2* expression. Data mined from the Allen Human Brain Atlas, z-scores shown. **Right:** bar plot of z-scores from regions of the developing brain, combining the data from all sub-regions for each region.

#### Figure S2. Location of chromosomal deletions and duplications of newly described patients.

- a. Genomic location of copy number change in patient DNA ascertained by chromosomal microarray. Position of *TP53BP2* is shown with a black arrow. The data are shown are for the following:
  - i. Case 1 (DECIPHER 263059) – location of deleted region indicated by a yellow line.
  - ii. Case 2 (DECIPHER 279742) – location of deleted region indicated by probes outside of the marked diploid region.
  - iii. Case 3 (DECIPHER 257458) – location of deleted region indicated by a yellow line.
  - iv. Case 4 (DECIPHER 271297) - location of deleted region indicated by red shading.
  - v. Case 5 (DECIPHER 266948) – location of deleted region indicated by probe positions (red markers unmatched by blue markers).
  - vi. Case 6 (DECIPHER 257256) - location of deleted region indicated by orange shading.
  - vii. Case 7 - location of deleted region indicated by probe positions outside the diploidy interval delimited by two lines.

**Figure S3. Intraventricular haemorrhage and other abnormalities in *Trp53bp2*<sup>Δ3/Δ3</sup> embryos.**

- a. Intraventricular haemorrhage (white arrows) in *Trp53bp2*<sup>Δ3/Δ3</sup> embryos in Balb/c and C57BL/6 backgrounds.
- b. Haemorrhage in lateral ventricle (red arrow) in a Balb/c *Trp53bp2*<sup>Δ3/Δ3</sup> embryo as seen by microCT. Blood is also seen in other CSF spaces in other *Trp53bp2*<sup>Δ3/Δ3</sup> embryos.
- c. Spinal canal stenosis: open (left) vs closed (right) spinal canal (red arrow) in E14.5 wild type vs E14.5 *Trp53bp2*<sup>Δ3/Δ3</sup> embryo, respectively. HREM images shown.
- d. Haemorrhage inside spinal canal in E14.5 *Trp53bp2*<sup>Δ3/Δ3</sup> embryo vs clear spinal canal in wild type E14.5 embryo (red arrows). HREM images shown.
- e. Cyst-like structures found in the spinal column of E14.5 *Trp53bp2*<sup>Δ3/Δ3</sup> embryo (red arrows), while the spinal canal (below) is clear in the wild type littermate (single red arrow). HREM images shown.

**Figure S4. Details on CNS phenotypes of *Trp53bp2*<sup>Δ3/Δ3</sup> embryos.**

- a. Exencephaly in E14.5 *Trp53bp2*<sup>Δ3/Δ3</sup> Balb/c embryo: lateral ventricular zone tissue protrudes outside the head, axial (**center**) and sagittal (**right**) views. MicroCT images shown.
- b. Gross opening of the neural tube as seen in E14.5 *Trp53bp2*<sup>Δ3/Δ3</sup> embryo with spina bifida (black arrow). MicroCT images shown.
- c. Gender genotyping of *Trp53bp2*<sup>Δ3/Δ3</sup> embryos with NTD phenotype. Embryos positive for *ZFY* are male.

**Figure S5. Few genes that cause NTDs in mice lie in regions whose deletion is associated with human NTDs**

- a. Positions of genes in the human genome that are orthologous to genes that cause NTDs when mutated in mice. Each gene is indicated as a black line; coloured dots mark the associated NTD phenotype in mice. Cytogenetic chromosomal bands are marked in grey and white; regions with

heterochromatin in light blue. The location of bands the deletion of which is associated with NTDs in humans marked with red lines and labelled.

- b. Focus on the 1q4 region, which is significantly associated with NTDs in humans. Genes are marked that cause NTDs when deleted in mice.

**Figure S6. Abnormalities in *Trp53bp2*<sup>Δ3/Δ3</sup> embryos and heart function in *Trp53bp2*<sup>Δ3/Δ3</sup> adult mice.**

- a. Phenotypes detected in E13.5 and E14.5 *Trp53bp2*<sup>Δ3/Δ3</sup> embryos by visual/light microscopy inspection, microCT and HREM, and phenotypes detected in E13.5 and E14.5 *Trp53bp2*<sup>Δ3/+</sup> embryos by microCT. In the case of BALB/c embryos, eye abnormalities were difficult to determine visually and therefore quantified for a small number of embryos. CNS, central nervous system.
- b. Heart function in *Trp53bp2*<sup>Δ3/Δ3</sup> vs wild type adult BALB/c mice examined by echocardiography. LV is left ventricular, VTI is velocity time integral. Values are mean ± SEM.
- c. Small and elongated 1<sup>st</sup> pair of spinal ganglia (pair of red arrows) in a *Trp53bp2*<sup>Δ3/Δ3</sup> embryo; spinal canal stenosis (single red arrow). HREM images shown.
- d. Significantly enlarged trigeminal ganglia (red arrows) in *Trp53bp2*<sup>Δ3/Δ3</sup> embryo; HREM images shown.

**Figure S7. Abnormalities shown by adult *Trp53bp2*<sup>Δ4/+</sup> mice**

- a. Birth rates of wild type, *Trp53bp2*<sup>Δ4/+</sup> and *Trp53bp2*<sup>Δ4/Δ4</sup> mice and embryos in heterozygous-heterozygous matings.
- b. Results from the Open field test performed on *Trp53bp2*<sup>Δ4/+</sup> mice (denoted *Trp53bp2*<sup>+/-</sup>) vs wild type controls (*Trp53bp2*<sup>+/+</sup>): distance travelled in the peripheral part of the arena (left), average speed in the periphery (center) and % time spent in the center of the arena. P values were obtained by IMPC's Mixed Model framework, linear-mixed effects model. N. s., not significant.

- c. Forelimb and hindlimb grip strength normalised by body weight for *Trp53bp2<sup>Δ4/+</sup>* mice (denoted *Trp53bp2<sup>+/-</sup>*) vs wild type controls (*Trp53bp2<sup>+/+</sup>*). P values were obtained by IMPC's Mixed Model framework, linear-mixed effects model. \*,  $p < 0.05$ .
- d. Tibia length (left panel) and bone density (right panel) as determined by X-ray and Dual Energy X-ray Absorptiometry, respectively, in *Trp53bp2<sup>Δ4/+</sup>* mice (denoted *Trp53bp2<sup>+/-</sup>*) vs wild type controls (*Trp53bp2<sup>+/+</sup>*). P values were obtained by IMPC's Mixed Model framework, linear-mixed effects model. \*,  $p < 0.05$ ; \*\*,  $p < 0.01$ ; n. s., not significant.
- e. Glucose tolerance measured by the Intraperitoneal glucose tolerance test in *Trp53bp2<sup>Δ4/+</sup>* mice (denoted *Trp53bp2<sup>+/-</sup>*) vs wild type controls (*Trp53bp2<sup>+/+</sup>*). P values were obtained by IMPC's Mixed Model framework, linear-mixed effects model; \*\*,  $p < 0.01$ ; \*\*\*,  $p < 0.001$ ; \*\*\*\*,  $p < 0.0001$ .

## SUPPLEMENTARY TABLES

### Supplementary Table S1

**Summary of new and previously published cases of 1q41q42 microdeletions, and novel cases of 1q41q42 microduplications.** <sup>a</sup>hypertonia; <sup>b</sup>clinodactyly of 5<sup>th</sup> digits; ID – intellectual disability; LV – lateral ventricles; N/S – not specified; N/A – not applicable or available.

1q41q42 microdeletion postnatal

1q41q42 microdeletion prenatal

1q41q42 microdeletion

| Case #                  | Age at diagnosis | Gender | Deletion/duplication coordinates (hg19) | Size of deletion | TP53BP2 deleted? | Inheritance | Brain MRI analysed? | Developmental delay/ID | Behaviour problems | Hypotonia | Seizures | Brain abnormalities | Enlarged/dysmorphic LVs | Corpus callosum abnormalities | Encephalocele | Microcephaly | Growth retardation | Craniofacial abnormalities | Unusual iris | Strabismus | Full or tented lips | Congenital diaphragmatic hernia | Congenital heart defects | Pectus deformity | Male genital abnormalities | Limb shortening | Clubfoot | Short fingers | Nail hypoplasia | Peiger-Huet anomaly |     |
|-------------------------|------------------|--------|-----------------------------------------|------------------|------------------|-------------|---------------------|------------------------|--------------------|-----------|----------|---------------------|-------------------------|-------------------------------|---------------|--------------|--------------------|----------------------------|--------------|------------|---------------------|---------------------------------|--------------------------|------------------|----------------------------|-----------------|----------|---------------|-----------------|---------------------|-----|
| Case 1 (DCIPHER 263059) | 2y               | Male   | 1:222,07-5,911-228,894, 743             | 6.8 Mb           | YES              | de novo     | N/A                 | +                      | N/S                | -         | -        | +                   | +                       | +                             | -             | -            | -                  | -                          | -            | -          | -                   | -                               | -                        | -                | -                          | -               | -        | -             | -               | -                   |     |
| Case 2 (DCIPHER 279742) | 7y               | Male   | 1:222,69-4,309-224,069, 984             | 1.38 Mb          | YES              | paternal    | N/R                 | +                      | -                  | -         | -        | N/A                 | N/A                     | N/A                           | -             | -            | -                  | -                          | -            | -          | -                   | -                               | -                        | -                | -                          | -               | -        | -             | -               | -                   |     |
| Case 3 (DCIPHER 257458) | 9y               | Male   | 1:223,82-0,857-224,076, 392             | 2.21 Mb          | YES              | de novo     | N/R                 | +                      | -                  | -         | -        | N/A                 | N/A                     | N/A                           | -             | -            | -                  | -                          | -            | -          | -                   | -                               | -                        | -                | -                          | -               | -        | -             | -               | -                   |     |
| Case 4 (DCIPHER 271297) | 9y               | Female | 1:221,65-4,334-224,660, 615             | 3.0 Mb           | YES              | N/A         | YES                 | +                      | +                  | -         | -        | +                   | +                       | +                             | -             | -            | -                  | -                          | -            | -          | -                   | -                               | -                        | -                | -                          | -               | -        | -             | -               | -                   |     |
| Case 5 (DCIPHER 266948) | 7m               | Female | 1:222,69-4,079-227,147, 000             | 4.45 Mb          | YES              | de novo     | YES                 | +                      | N/S                | +         | -        | +                   | +                       | +                             | -             | -            | -                  | -                          | -            | -          | -                   | -                               | -                        | -                | -                          | -               | -        | -             | -               | -                   |     |
| Case 6 (DCIPHER 257256) | Prenatal         | Male   | 1:222,73-2,707-224,034, 322             | 1.30 Mb          | YES              | maternal    | N/A                 | N/A                    | N/A                | N/A       | +        | +                   | +                       | +                             | +             | +            | +                  | +                          | +            | +          | +                   | +                               | +                        | +                | +                          | +               | +        | +             | +               | +                   |     |
| Case 7                  | Prenatal         | Female | 1:221,48-4,568-229,116, 929             | 7.6 Mb           | YES              | N/A         | YES                 | N/S                    | N/S                | N/A       | +        | +                   | +                       | +                             | -             | -            | -                  | -                          | -            | -          | -                   | -                               | -                        | -                | -                          | -               | -        | -             | -               | -                   |     |
| Shaffer 1-7             | N/A              | N/A    | N/A                                     | N/A              | 7/7              | N/A         | N/A                 | 2/6                    | 6/6                | 2/6       | 1/6      | 5/6                 | 2/6                     | 3/6                           | 1/2           | 0/7          | 4/7                | 3/5                        | 7/7          | 1/6        | 4/7                 | 2/7                             | 1/7                      | 1/7              | 0/5                        | 2/7             | 3/7      | 3/7           | 1/2             | 1/2                 |     |
| Rosenfeld 8-9,12-13     | N/A              | N/A    | N/A                                     | N/A              | YES (4/4)        | de novo     | YES                 | 4/4                    | 1/4                | 4/4       | 3/4      | 4/4                 | 4/4                     | 4/4                           | 2/4           | 0/4          | 2/4                | 1/4                        | 4/4          | 1/4        | 2/4                 | 0/4                             | 2/4                      | 0/4              | 1/3                        | 0/4             | 0/4      | 1/4           | 1/4             | 1/4                 |     |
| Mazzeu 1, 2             | N/A              | N/A    | N/A                                     | N/A              | YES (2/2)        | de novo     | N/A                 | 2/2                    | 0/1                | 1/1       | 0/2      | 2/2                 | 2/2                     | 1/2                           | 0/2           | 0/2          | 0/2                | 2/2                        | 2/2          | 2/2        | 2/2                 | 0/2                             | 2/2                      | 0/2              | 1/2                        | 2/2             | 2/2      | 2/2           | 2/2             | 2/2                 | 2/2 |
| Rice 2006               | 10m              | Male   | 1:221,91-1,605-227,293, 265             | 5.38 Mb          | YES              | N/A         | N/R                 | +                      | -                  | +         | +        | +                   | +                       | +                             | -             | -            | -                  | -                          | -            | -          | -                   | -                               | -                        | -                | -                          | -               | -        | -             | -               | -                   | -   |
| Slavotnek 2009          | NS               | Male   | 1:221,28-8,725-230,748, 012             | 9.46 Mb          | YES              | de novo     | N/A                 | N/A                    | N/S                | N/S       | N/S      | N/S                 | N/S                     | N/S                           | -             | -            | -                  | -                          | -            | -          | -                   | -                               | -                        | -                | -                          | -               | -        | -             | -               | -                   | -   |
| Filges 2010             | 10m              | Female | 1:223,82-8,382-229,256, 492             | 5.43 Mb          | YES              | de novo     | N/A                 | +                      | -                  | -         | +        | +                   | +                       | +                             | -             | -            | -                  | -                          | -            | -          | -                   | -                               | -                        | -                | -                          | -               | -        | -             | -               | -                   | -   |
| Spreiz 2014             | 8y               | Female | 1:222,01-5,102-225,414, 828             | 3.4 Mb           | YES              | de novo     | YES                 | +                      | -                  | +         | +        | -                   | -                       | -                             | -             | -            | -                  | -                          | -            | -          | -                   | -                               | -                        | -                | -                          | -               | -        | -             | -               | -                   | -   |
| Christensen 2012        | 2y               | Male   | 1:223,300-6,895-226,3504, 293           | 2.2 Mb           | YES              | de novo     | N/A                 | YES                    | +                  | +         | +        | +                   | +                       | +                             | -             | -            | -                  | -                          | -            | -          | -                   | -                               | -                        | -                | -                          | -               | -        | -             | -               | -                   | -   |
| Jun et al, 2013         | 2m               | Female | 1:223,10-4,211-223,287, 570             | 0.18 Mb          | NO               | maternal    | YES                 | N/S                    | N/S                | N/S       | +        | -                   | -                       | -                             | -             | -            | -                  | -                          | -            | -          | -                   | -                               | -                        | -                | -                          | -               | -        | -             | -               | -                   | -   |
| Au et al, 2014          | 15y              | Female | 1:224,23-3,297-224,820, 132             | 0.59 Mb          | NO               | N/A         | YES                 | +                      | -                  | -         | +        | -                   | -                       | -                             | -             | -            | -                  | -                          | -            | -          | -                   | -                               | -                        | -                | -                          | -               | -        | -             | -               | -                   | -   |
| Rosenfeld 10,11,14      | N/A              | N/A    | N/A                                     | N/A              | NO               | N/A         | N/R                 | 2/2                    | 1/2                | 2/2       | 0/2      | 0/2                 | 0/1                     | 0/1                           | 0/3           | 1/2          | 1/2                | 1/2                        | 1/2          | 1/2        | 1/2                 | 0/3                             | 1/3                      | 0/2              | 0/1                        | 0/2             | 0/3      | 0/2           | 0/2             | 0/1                 |     |

**Supplementary Table S2. Neuroradiological analysis of 1q41q42 microdeletion patients**

| Patient          | DECIPHER number | TP53BP2 deleted? | Brain MRI description                                                                                                                                                                                                                                                                                                                                                                                                                                                                                                                                                                                                                                                 |
|------------------|-----------------|------------------|-----------------------------------------------------------------------------------------------------------------------------------------------------------------------------------------------------------------------------------------------------------------------------------------------------------------------------------------------------------------------------------------------------------------------------------------------------------------------------------------------------------------------------------------------------------------------------------------------------------------------------------------------------------------------|
| Case 1           | 263059          | deleted          | Ventricles are obviously dysmorphic with absent corpus callosum. There is a monoventricle, thalamic fusion and holoprosencephaly with a grey matter bridge extending from the frontal lobe towards the occiput. Posteriorly there is some midline differentiation into 2 occipital lobes; microcephaly                                                                                                                                                                                                                                                                                                                                                                |
| Case 2           | 279742          | deleted          | N/A                                                                                                                                                                                                                                                                                                                                                                                                                                                                                                                                                                                                                                                                   |
| Case 3           | 257458          | deleted          | N/A                                                                                                                                                                                                                                                                                                                                                                                                                                                                                                                                                                                                                                                                   |
| Case 4           | 271297          | deleted          | Lateral ventricles more parallel appearance at their superior aspect; relatively hypoplastic corpus callosum                                                                                                                                                                                                                                                                                                                                                                                                                                                                                                                                                          |
| Case 5           | 266948          | deleted          | Generalised cerebral atrophy, especially over the frontotemporal region with large ventricles, thin corpus callosum                                                                                                                                                                                                                                                                                                                                                                                                                                                                                                                                                   |
| Case 6           | 257256          | deleted          | Occipital encephalocele                                                                                                                                                                                                                                                                                                                                                                                                                                                                                                                                                                                                                                               |
| Case 7           | -               | deleted          | Agenesis of corpus callosum, prominent midline interhemispheric fluid, minor cerebellar hypoplasia                                                                                                                                                                                                                                                                                                                                                                                                                                                                                                                                                                    |
| Jun et al, 2013  | -               | not deleted      | Normal                                                                                                                                                                                                                                                                                                                                                                                                                                                                                                                                                                                                                                                                |
| Au et al, 2014   | -               | not deleted      | Normal                                                                                                                                                                                                                                                                                                                                                                                                                                                                                                                                                                                                                                                                |
| Rosenfeld 10     | -               | not deleted      | Normal                                                                                                                                                                                                                                                                                                                                                                                                                                                                                                                                                                                                                                                                |
| Rosenfeld 11     | -               | not deleted      | N/A                                                                                                                                                                                                                                                                                                                                                                                                                                                                                                                                                                                                                                                                   |
| Rosenfeld 14     | -               | not deleted      | Normal                                                                                                                                                                                                                                                                                                                                                                                                                                                                                                                                                                                                                                                                |
| Shaffer 1        | -               | deleted          | Normal                                                                                                                                                                                                                                                                                                                                                                                                                                                                                                                                                                                                                                                                |
| Shaffer 2        | -               | deleted          | Mild prominence of lateral ventricles (2y); The ventricular system is top-normal in size, shape and configuration (9y)                                                                                                                                                                                                                                                                                                                                                                                                                                                                                                                                                |
| Shaffer 3        | -               | deleted          | 1992: nonspecific increase in ventricular size; 2006: lateral ventricles somewhat prominent for age; restricted diffusion identified to suggest acute ischemia. Dysmorphic lateral ventricles with left LV being slightly larger than right; The trigones and posterior parts of the bodies of both lateral ventricles are more parallel than usual and slightly more bulbous, this appearance resembles minor colpocephaly which is a configuration associated with agenesis of the corpus callosum. The more lateral aspects of the posterior part of the body of the corpus callosum may be somewhat hypoplastic, leading to the observed ventricular dysmorphism. |
| Shaffer 4        | -               | deleted          | Malformation of lateral ventricles, pointed frontal horns, fourth ventricle larger than normal; small cerebellum (CT), gyral malformations; malformations of sulcation, particularly around central sulcus                                                                                                                                                                                                                                                                                                                                                                                                                                                            |
| Shaffer 5        | -               | deleted          | Normal                                                                                                                                                                                                                                                                                                                                                                                                                                                                                                                                                                                                                                                                |
| Shaffer 6        | -               | deleted          | Enlarged ventricles prenatally                                                                                                                                                                                                                                                                                                                                                                                                                                                                                                                                                                                                                                        |
| Shaffer 7        | -               | deleted          | N/A                                                                                                                                                                                                                                                                                                                                                                                                                                                                                                                                                                                                                                                                   |
| Rosenfeld 8      | -               | deleted          | Dysmorphism of lateral ventricles, hypoplastic corpus callosum; retrocerebellar and prepontine arachnoid cysts; displacement of the pons away from the clivus by CSF material, mild cortical atrophy, prominent peripapillary atrophy, mega cisterna magna                                                                                                                                                                                                                                                                                                                                                                                                            |
| Rosenfeld 9      | -               | deleted          | Prominent subarachnoid space; Inferior right parietal lobe punctuate focus of abnormal susceptibility; slightly hypoplastic corpus callosum                                                                                                                                                                                                                                                                                                                                                                                                                                                                                                                           |
| Rosenfeld 12     | -               | deleted          | Mild thinning of the periventricular white matter, ventricle size mildly prominent; Delayed myelination                                                                                                                                                                                                                                                                                                                                                                                                                                                                                                                                                               |
| Rosenfeld 13     | -               | deleted          | Wide cisterna magna; mild cerebellar atrophy or hypoplasia; dysmorphic appearance of lateral ventricles with a relatively parallel configuration and slight effacement of the supra and lateral aspects of the bodies of the lateral ventricles; somewhat hypoplastic brainstem                                                                                                                                                                                                                                                                                                                                                                                       |
| Rice             | -               | deleted          | Hypomyelination                                                                                                                                                                                                                                                                                                                                                                                                                                                                                                                                                                                                                                                       |
| Mazzeu 1         | -               | deleted          | Left brain hemiatrophy with cortical dysplasia, possible microgyria at right                                                                                                                                                                                                                                                                                                                                                                                                                                                                                                                                                                                          |
| Mazzeu 2         | -               | deleted          | Agenesis of corpus callosum, delayed myelination                                                                                                                                                                                                                                                                                                                                                                                                                                                                                                                                                                                                                      |
| Slavotinek       | -               | deleted          | N/A                                                                                                                                                                                                                                                                                                                                                                                                                                                                                                                                                                                                                                                                   |
| Filges 2010      | -               | deleted          | Agenesis of corpus callosum, colpocephaly                                                                                                                                                                                                                                                                                                                                                                                                                                                                                                                                                                                                                             |
| Spreiz 2014      | -               | deleted          | Normal; common incidental anatomical variant of the ventricles in the form a cavum septum pellucidum.                                                                                                                                                                                                                                                                                                                                                                                                                                                                                                                                                                 |
| Christensen 2012 | -               | deleted          | Agenesis of corpus callosum, somewhat small cerebellar vermis                                                                                                                                                                                                                                                                                                                                                                                                                                                                                                                                                                                                         |
| Wat 2011         | -               | deleted          | Severe asymmetrical cerebral atrophy with <i>ex vacuo</i> dilation of the lateral ventricle                                                                                                                                                                                                                                                                                                                                                                                                                                                                                                                                                                           |

**Supplementary Table S3. Genotype and NTD frequencies of mice derived from *Trp53bp2* heterozygous matings in mixed 129Sv-C57BL/6 ('mixed') and pure C57BL/6 ('B6') backgrounds.** +/+ denotes *Trp53bp2*<sup>+/+</sup>, Δ3/+ denotes *Trp53bp2*<sup>Δ3/+</sup>, Δ3/Δ3 denotes *Trp53bp2*<sup>Δ3/Δ3</sup>. Distribution of +/+, +/Δ3 and Δ3/Δ3 genotypes does not differ significantly from a 1:2:1 ratio among embryos ( $\chi^2 = 1.78$ ,  $p > 0.05$ , Chi-squared test), whereas there is a significant deviation from this ratio among postnatal mice ( $\chi^2 = 198.9$ ,  $p < 0.001$ , Chi-squared test).

<sup>a</sup>Percentage of *Trp53bp2*<sup>Δ3/Δ3</sup> embryos amongst all genotypes.

<sup>b</sup>Percentage of NTDs amongst *Trp53bp2*<sup>Δ3/Δ3</sup> embryos only.

| STAGE                  | +/+ | +/Δ3 | Δ3/Δ3 <sup>a</sup> | TOTAL | NTDs <sup>b</sup> |
|------------------------|-----|------|--------------------|-------|-------------------|
| <b>Prenatal mixed</b>  |     |      |                    |       |                   |
| <b>E9.5</b>            | 6   | 27   | 16 (33%)           | 49    | 2 (13%)           |
| <b>E10.5</b>           | 12  | 28   | 17 (30%)           | 57    | 4 (24%)           |
| <b>E11.5</b>           | 28  | 57   | 22 (21%)           | 107   | 2 (9%)            |
| <b>E12.5</b>           | 5   | 21   | 8 (24%)            | 34    | 0                 |
| <b>E13.5</b>           | 10  | 18   | 10 (26%)           | 38    | 2 (20%)           |
| <b>E14.5</b>           | 4   | 5    | 4 (31%)            | 13    | 0                 |
| <b>E15.5</b>           | 21  | 44   | 18 (22%)           | 83    | 5 (28%)           |
| <b>E16.5</b>           | 11  | 21   | 14 (30%)           | 46    | 3 (21%)           |
| <b>E17.5</b>           | 6   | 20   | 7 (22%)            | 33    | 0                 |
| <b>E18.5</b>           | 5   | 7    | 10 (32%)           | 22    | 1 (10%)           |
| <b>TOTAL</b>           | 112 | 260  | 127 (26%)          | 499   | 19 (15%)          |
| <b>Postnatal mixed</b> |     |      |                    |       |                   |
| <b>P5-P30</b>          | 353 | 644  | 68 (6.4%)          | 1065  | 0                 |
| <b>Prenatal B6</b>     |     |      |                    |       |                   |



|              |    |    |          |    |         |
|--------------|----|----|----------|----|---------|
| <b>E14.5</b> | 14 | 34 | 13 (21%) | 61 | 6 (46%) |
|--------------|----|----|----------|----|---------|
